# Supplementary material
Source: PubMed Central journal article supplement (PMC5792294)
Supplement: 2017_181636-Disclosures_and_Contributions.pdf [file 2017_181636-Disclosures_and_Contributions.pdf]

Haematologica  
HAEMATOL/2017/181636  
Version 3

Promising activity of selinexor in the treatment of a patient with refractory diffuse large B-cell lymphoma and central nervous system involvement

Sabela Bobillo, Pau Abrisqueta, Cecilia Carpio, Priyanka Raheja, Josep Castellví, Marta Crespo, and Francesc Bosch

Disclosures: The authors declare no competing financial interests

Contributions: S.B, P.A and C.C were responsible for clinical management of the patient, acquired data and provided patient follow up. All the authors contributed to the writing, approval and review of the manuscript
